# Supplementary material for: MyD88 is critically involved in immune tolerance breakdown at environmental interfaces of Foxp3-deficient mice
Source: JCI journal article supplement (doi:10.1172/jci40591), 2012-04-02

## Supplementary Figure Legends

**Supplemental Figure 1.** **A.** Survival curves of  $\text{Foxp3}^{\text{mut}}$ ,  $\text{IL1R1}^{-/-}\text{Foxp3}^{\text{mut}}$ ,  $\text{TLR2}^{-/-}\text{Foxp3}^{\text{mut}}$ ,  $\text{TLR4}^{-/-}\text{Foxp3}^{\text{mut}}$  and  $\text{TLR5}^{-/-}\text{Foxp3}^{\text{mut}}$  mice. **B.** Skin and lung inflammation in  $\text{TLR2}^{-/-}\text{Foxp3}^{\text{mut}}$ ,  $\text{TLR4}^{-/-}\text{Foxp3}^{\text{mut}}$  and  $\text{IL1R1}^{-/-}\text{Foxp3}^{\text{mut}}$  mice (H & E, 200X magnification). **C.** Phenotypic characteristics of  $\text{Foxp3}$  and  $\text{TLR/IL-1R1}$  single and double mutant mice at 30 d of age, including weight, alopecia, skin hemorrhages and dryness. **D.** Expression of cytokine transcripts in the skin of  $\text{Foxp3}$  and  $\text{TLR/IL-1R1}$  single and double mutant mice, determined by real time PCR analysis. Each point represents results obtained from one individual mouse. Results in panel **A** reflect 4-21 mice/group, and in panels **B-D** of 4-10 mice/group, derived from 4-7 independent experiments. \* $p < 0.05$ ; \*\* $p < 0.01$ , \*\*\* $p < 0.001$ .

**Supplemental Figure 2.** Characteristics of the lymphoproliferative disease in the spleens of  $\text{Foxp3}^{\text{mut}}$  versus  $\text{MyD88}^{-/-}\text{Foxp3}^{\text{mut}}$  mice. **A.** Total lymphocyte counts and absolute cell numbers of  $\text{CD4}^{+}$  effector memory T cells ( $\text{CD4}^{+}\text{CD62L}^{\text{low}}\text{CD44}^{\text{high}}$ ),  $\text{CD8}^{+}$  T cells and  $\text{B220}^{+}$  B cells in the draining lymph nodes of the respective genotype. **B.** Enumeration of IL-17-,  $\text{IFN}\gamma$ - and IL-4- producing  $\text{CD4}^{+}$  T cells in the spleens of WT and mutant mice. **C.** Representative flow cytometric panels of the results shown in **B**. Results are representative of 3-5 experiments involving 5-10 mice/group.

**Supplemental Figure 3.** Early onset of the exaggerated autoimmune lymphoproliferation in  $\text{MyD88}^{-/-}\text{Foxp3}^{\text{mut}}$  mice. Total lymphocyte counts and absolute numbers of  $\text{CD4}^{+}$  effector memory T cells ( $\text{CD4}^{+}\text{CD62L}^{\text{low}}\text{CD44}^{\text{high}}$ ),  $\text{CD8}^{+}$  T cells and

B220<sup>+</sup> B cells in the draining lymph nodes of WT, MyD88<sup>-/-</sup>, Foxp3<sup>mut</sup> and MyD88<sup>-/-</sup> Foxp3<sup>mut</sup> mice were enumerated at 3 and 6 weeks of age. Results were obtained on 3-4 mice per group.

**Supplemental Figure 4.** Flow cytometric analysis of CD ligand (CD30L) and OX40 in T cells of WT, Foxp3<sup>mut</sup> and MyD88<sup>-/-</sup>Foxp3<sup>mut</sup> mice. **A.** Flow cytometric profiles of OX40 and CD30L expression in CD4<sup>+</sup> naïve (CD62L<sup>high</sup>CD44<sup>low</sup>) and effector memory (CD62L<sup>low</sup>CD44<sup>high</sup>) T cells isolated from the draining lymph nodes and lungs of the respective mouse strains. **B.** Percent expression of OX40 and CD30L in CD4<sup>+</sup> effector memory as compared to naïve T cells in the respective mouse strains. Results were obtained on 3-9 mice per group.

# Supplemental Figure 1

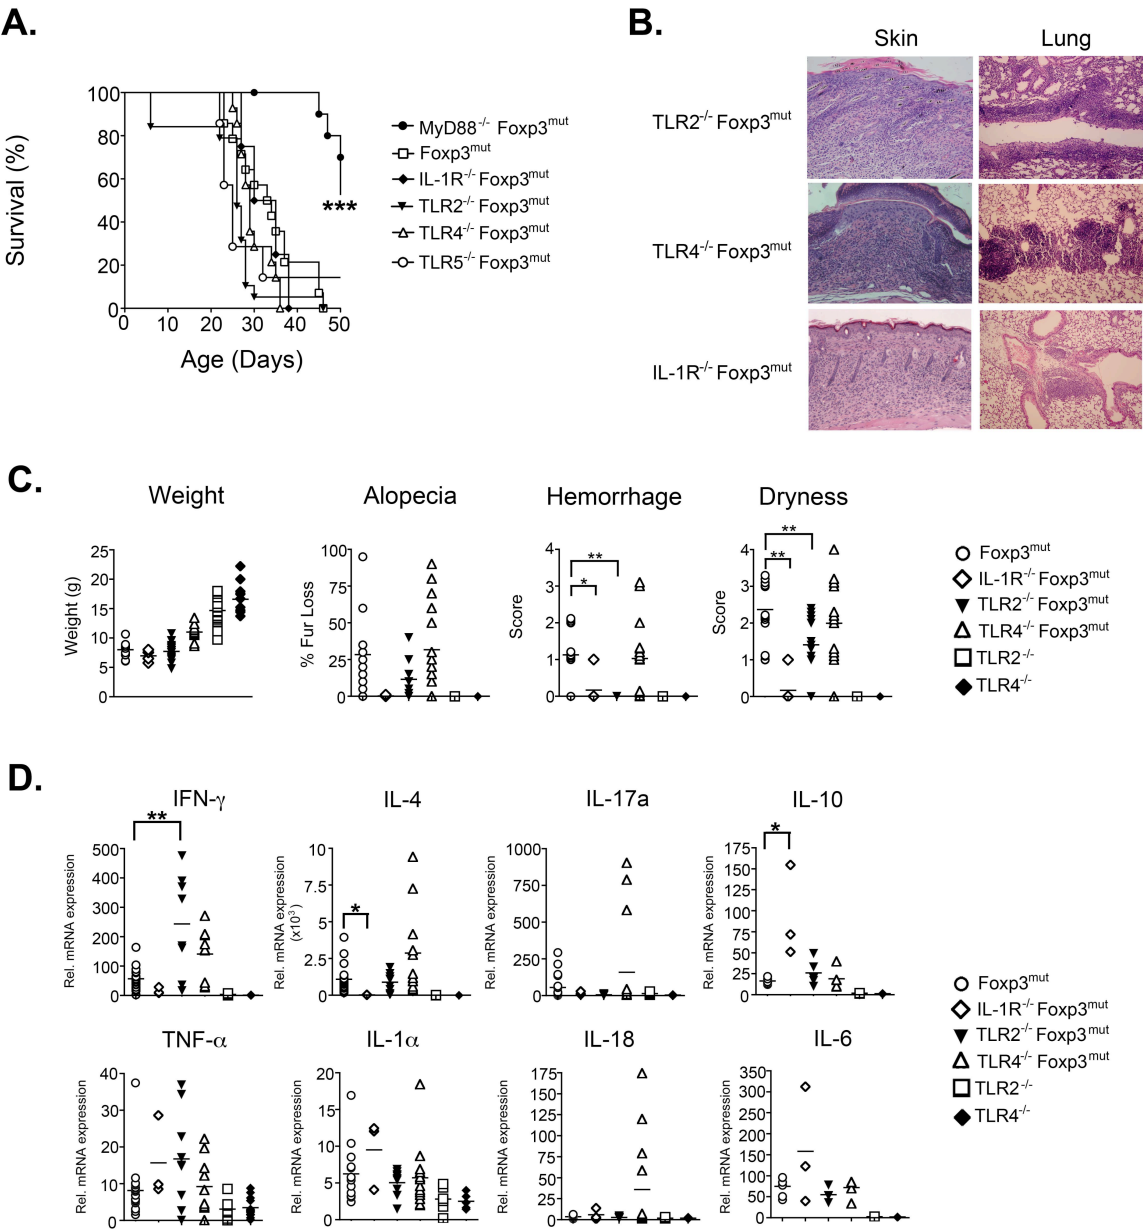

## Supplemental Figure 2

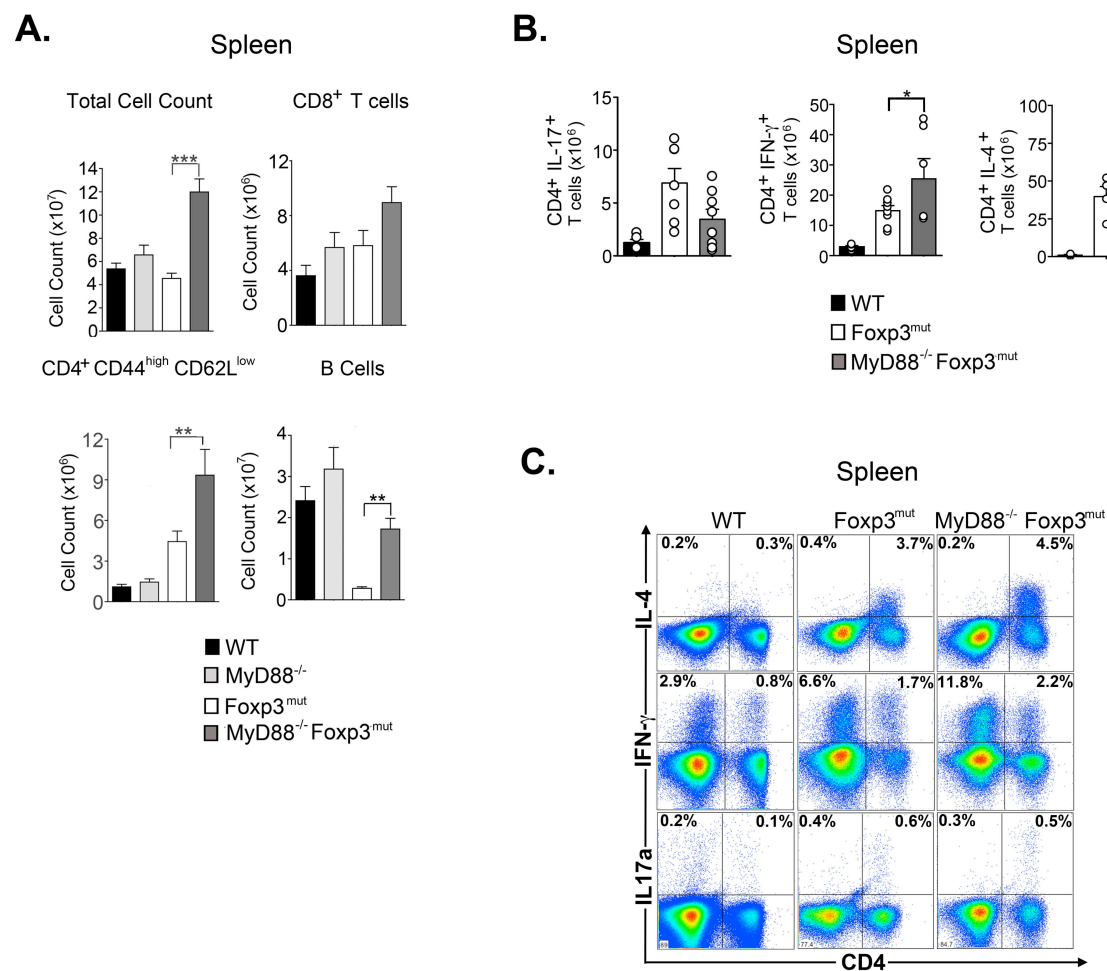



## Supplemental Figure 3

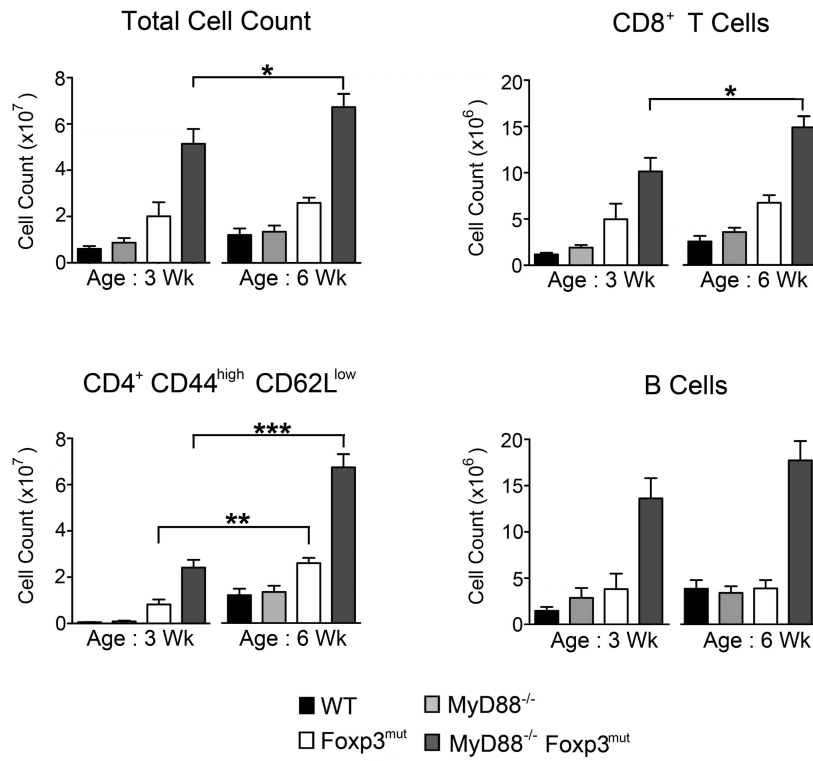

# Supplemental Figure 4

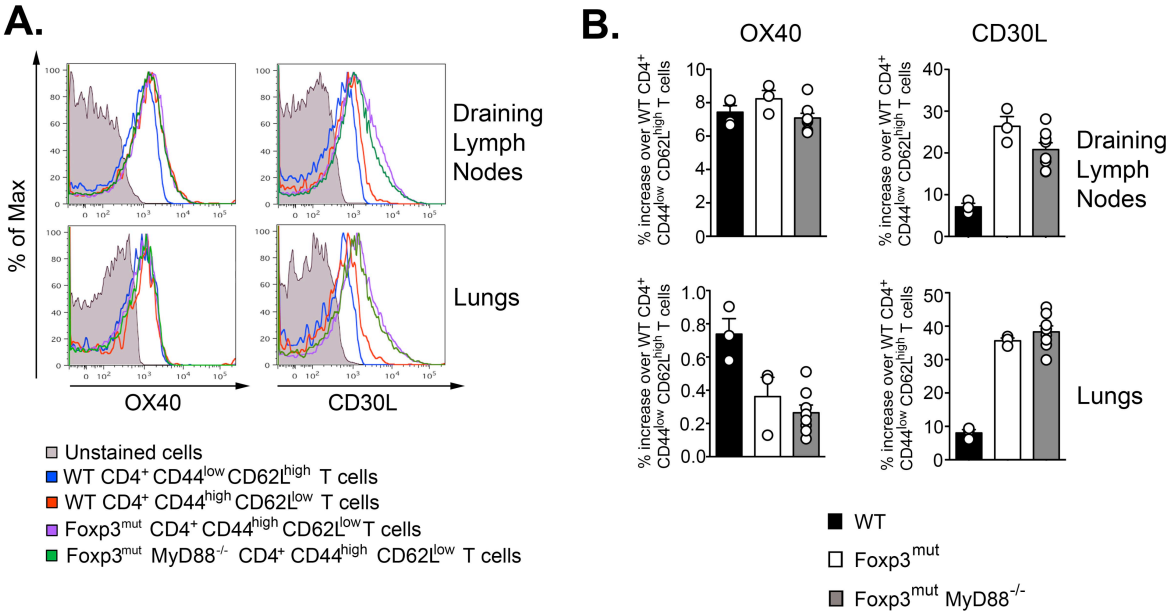

Supplement: sd1 [file 1]
